# Supplementary material for: Prognostic Nutritional Index (PNI) in Patients With Breast Cancer Treated With Neoadjuvant Chemotherapy as a Useful Prognostic Indicator
Source: PubMed Central journal article supplement (PMC8042235; doi:10.3389/fcell.2021.656741), 2021-03-30
Supplement: Table_1.pdf [file Table_1.pdf]

Supplementary Table 1 Demographic and clinicopathologic characteristics of 785 patients with breast cancer

| Parameters     | N           | PNI 785     |              |          |         | N           | PNI 477     |              |          |         | N           | PNI 308    |              |          |         |
|----------------|-------------|-------------|--------------|----------|---------|-------------|-------------|--------------|----------|---------|-------------|------------|--------------|----------|---------|
| Cases (n)      | 785         | Low PNI 253 | High PNI 532 | $\chi^2$ | P value |             | Low PNI 167 | High PNI 310 | $\chi^2$ | P value |             | Low PNI 86 | High PNI 222 | $\chi^2$ | P value |
| Age (years)    |             |             |              | 1.649    | 0.199   |             |             |              | 3.347    | 0.067   |             |            |              | 0.134    | 0.714   |
| <47            | 386(49.17%) | 116(45.85%) | 270(50.75%)  |          |         | 230(48.22%) | 71(42.51%)  | 159(51.29%)  |          |         | 156(50.65%) | 45(52.33%) | 111(50.00%)  |          |         |
| ≥47            | 399(50.83%) | 137(54.15%) | 262(49.25%)  |          |         | 247(51.78%) | 96(57.49%)  | 151(48.71%)  |          |         | 152(49.35%) | 41(47.67%) | 111(50.00%)  |          |         |
| Marital status |             |             |              | 6.603    | 0.010   |             |             |              | 5.739    | 0.017   |             |            |              | 1.302    | 0.254   |
| Married        | 756(96.31%) | 250(98.81%) | 506(95.11%)  |          |         | 457(95.81%) | 165(98.80%) | 292(94.19%)  |          |         | 299(97.08%) | 85(98.84%) | 214(96.40%)  |          |         |
| Unmarried      | 29(3.69%)   | 3(1.19%)    | 26(4.89%)    |          |         | 20(4.19%)   | 2(1.20%)    | 18(5.81%)    |          |         | 9(2.92%)    | 1(1.16%)   | 8(3.60%)     |          |         |
| Occupation     |             |             |              | 4.906    | 0.086   |             |             |              | 1.548    | 0.461   |             |            |              | 4.360    | 0.113   |
| Mental worker  | 358(45.61%) | 122(48.22%) | 236(44.36%)  |          |         | 238(49.90%) | 84(50.30%)  | 154(49.68%)  |          |         | 120(38.96%) | 38(44.19%) | 82(36.93%)   |          |         |
| Manual worker  | 125(15.92%) | 47(18.58%)  | 78(14.66%)   |          |         | 66(13.84%)  | 27(16.17%)  | 39(12.58%)   |          |         | 59(19.16%)  | 20(23.25%) | 39(17.57%)   |          |         |
| Others         | 302(38.47%) | 84(33.20%)  | 218(40.98%)  |          |         | 173(36.26%) | 56(33.53%)  | 117(37.74%)  |          |         | 129(41.88%) | 28(32.56%) | 101(45.50%)  |          |         |
| Weight (Kg)    |             |             |              | 0.005    | 0.947   |             |             |              | 0.191    | 0.662   |             |            |              | 0.181    | 0.670   |
| <62.00         | 383(48.79%) | 123(48.62%) | 260(48.87%)  |          |         | 235(49.27%) | 80(47.90%)  | 155(50.00%)  |          |         | 148(48.05%) | 43(50.00%) | 105(47.30%)  |          |         |
| ≥62.00         | 402(51.21%) | 130(51.38%) | 272(51.13%)  |          |         | 242(50.73%) | 87(52.10%)  | 155(50.00%)  |          |         | 160(51.95%) | 43(50.00%) | 117(52.70%)  |          |         |
| Height (M)     |             |             |              | 0.273    | 0.601   |             |             |              | 0.812    | 0.368   |             |            |              | 0.338    | 0.561   |
| <1.60          | 337(42.93%) | 112(44.27%) | 225(42.29%)  |          |         | 218(45.70%) | 81(48.50%)  | 137(44.19%)  |          |         | 119(38.64%) | 31(36.05%) | 88(39.64%)   |          |         |
| ≥1.60          | 448(57.07%) | 141(55.73%) | 307(57.71%)  |          |         | 259(54.30%) | 86(51.50%)  | 173(55.81%)  |          |         | 189(61.36%) | 55(63.95%) | 134(60.36%)  |          |         |
| BMI            |             |             |              | 0.005    | 0.941   |             |             |              | 0.841    | 0.359   |             |            |              | 1.160    | 0.282   |
| <24.00         | 391(49.81%) | 126(49.80%) | 265(49.81%)  |          |         | 245(51.36%) | 81(48.50%)  | 164(52.90%)  |          |         | 146(47.40%) | 45(52.33%) | 101(45.50%)  |          |         |
| ≥24.00         | 394(50.19%) | 127(50.20%) | 267(50.19%)  |          |         | 232(48.64%) | 86(51.50%)  | 146(47.10%)  |          |         | 162(52.60%) | 41(47.67%) | 121(54.50%)  |          |         |
| Family history |             |             |              | 0.675    | 0.411   |             |             |              | 0.107    | 0.744   |             |            |              | 1.857    | 0.173   |
| No             | 597(76.05%) | 197(77.87%) | 400(75.19%)  |          |         | 347(72.75%) | 123(73.65%) | 224(72.26%)  |          |         | 250(81.17%) | 74(86.05%) | 176(79.28%)  |          |         |
| Yes            | 188(23.95%) | 56(22.13%)  | 132(24.81%)  |          |         | 130(27.25%) | 44(26.35%)  | 86(27.74%)   |          |         | 58(18.83%)  | 12(13.95%) | 46(20.72%)   |          |         |
| Menarche age   |             |             |              | 1.672    | 0.196   |             |             |              | 2.829    | 0.093   |             |            |              | 0.005    | 0.943   |
| <14            | 308(39.24%) | 91(35.97%)  | 217(40.79%)  |          |         | 196(41.09%) | 60(35.93%)  | 136(43.87%)  |          |         | 112(36.36%) | 31(36.05%) | 81(36.49%)   |          |         |

|                       |             |             |             |       |       |             |             |             |       |       |             |            |             |        |       |
|-----------------------|-------------|-------------|-------------|-------|-------|-------------|-------------|-------------|-------|-------|-------------|------------|-------------|--------|-------|
| ≥14                   | 477(60.76%) | 162(64.03%) | 315(59.21%) |       |       | 281(58.91%) | 107(64.07%) | 174(56.13%) |       |       | 196(63.64%) | 55(63.95%) | 141(63.51%) |        |       |
| Menopause             |             |             |             | 0.597 | 0.440 |             |             |             | 1.382 | 0.240 |             |            |             | 0.483  | 0.487 |
| No                    | 493(62.80%) | 154(60.87%) | 339(63.72%) |       |       | 280(58.70%) | 92(55.09%)  | 188(60.65%) |       |       | 213(69.16%) | 62(72.09%) | 151(68.02%) |        |       |
| Yes                   | 292(37.20%) | 99(39.13%)  | 193(36.28%) |       |       | 197(41.30%) | 75(44.91%)  | 122(39.35%) |       |       | 95(30.84%)  | 24(27.91%) | 71(31.98%)  |        |       |
| ABO blood type        |             |             |             | 1.043 | 0.791 |             |             |             | 0.889 | 0.828 |             |            |             | 1.615  | 0.656 |
| A                     | 214(27.26%) | 67(26.48%)  | 147(27.63%) |       |       | 132(27.67%) | 42(25.14%)  | 90(29.03%)  |       |       | 82(26.62%)  | 25(29.07%) | 57(25.68%)  |        |       |
| B                     | 262(33.38%) | 80(31.62%)  | 182(34.21%) |       |       | 145(30.40%) | 52(31.14%)  | 93(30.00%)  |       |       | 117(37.99%) | 28(32.56%) | 89(40.08%)  |        |       |
| O                     | 234(29.81%) | 80(31.62%)  | 154(28.95%) |       |       | 146(30.61%) | 54(32.34%)  | 92(29.68%)  |       |       | 88(28.57%)  | 26(30.23%) | 62(27.93%)  |        |       |
| AB                    | 75(9.55%)   | 26(10.28%)  | 49(9.21%)   |       |       | 54(11.32%)  | 19(11.38%)  | 35(11.29%)  |       |       | 21(6.82%)   | 7(8.14%)   | 14(6.31%)   |        |       |
| Tumor site            |             |             |             | 1.928 | 0.165 |             |             |             | 0.007 | 0.935 |             |            |             | 4.214  | 0.040 |
| Right                 | 369(47.01%) | 128(50.59%) | 241(45.30%) |       |       | 233(48.85%) | 82(49.10%)  | 151(48.71%) |       |       | 136(44.16%) | 46(53.49%) | 90(40.54%)  |        |       |
| Left                  | 416(52.99%) | 125(49.41%) | 291(54.70%) |       |       | 244(51.15%) | 85(50.90%)  | 159(51.29%) |       |       | 172(55.84%) | 40(46.51%) | 132(59.46%) |        |       |
| US-Primary tumor site |             |             |             | 3.199 | 0.525 |             |             |             | 2.136 | 0.711 |             |            |             | 12.640 | 0.013 |
| Upper outer quadrant  | 489(62.29%) | 158(62.45%) | 331(62.22%) |       |       | 305(63.94%) | 109(65.27%) | 196(63.23%) |       |       | 184(59.74%) | 49(56.98%) | 135(60.81%) |        |       |
| Lower outer quadrant  | 81(10.32%)  | 26(10.28%)  | 55(10.34%)  |       |       | 44(9.22%)   | 18(10.78%)  | 26(8.39%)   |       |       | 37(12.01%)  | 8(9.30%)   | 29(13.06%)  |        |       |
| Lower inner quadrant  | 37(4.71%)   | 10(3.95%)   | 27(5.08%)   |       |       | 18(3.77%)   | 6(3.59%)    | 12(3.87%)   |       |       | 19(6.17%)   | 4(4.65%)   | 15(6.76%)   |        |       |
| Upper inner quadrant  | 120(15.29%) | 35(13.83%)  | 85(15.97%)  |       |       | 61(12.80%)  | 17(10.18%)  | 44(14.19%)  |       |       | 59(19.16%)  | 18(20.93%) | 41(18.47%)  |        |       |
| Central               | 58(7.39%)   | 24(9.49%)   | 34(6.39%)   |       |       | 49(10.27%)  | 17(10.18%)  | 32(10.32%)  |       |       | 9(2.92%)    | 7(8.14%)   | 2(0.90%)    |        |       |
| US-Tumor size         |             |             |             | 3.980 | 0.137 |             |             |             | 0.386 | 0.825 |             |            |             | 2.900  | 0.235 |
| ≤2cm                  | 310(39.49%) | 88(34.78%)  | 222(41.73%) |       |       | 135(28.30%) | 45(26.95%)  | 90(29.03%)  |       |       | 175(56.82%) | 43(50.00%) | 132(59.46%) |        |       |
| >2 and <5cm           | 402(51.21%) | 137(54.15%) | 265(49.81%) |       |       | 273(57.23%) | 96(57.49%)  | 177(57.10%) |       |       | 129(41.88%) | 41(47.67%) | 88(39.64%)  |        |       |
| ≥5cm                  | 73(9.30%)   | 28(11.07%)  | 45(8.46%)   |       |       | 69(14.47%)  | 26(15.57%)  | 43(13.87%)  |       |       | 4(1.30%)    | 2(2.33%)   | 2(0.90%)    |        |       |
| US-LNM                |             |             |             | 0.058 | 0.809 |             |             |             | 0.678 | 0.410 |             |            |             | 0.033  | 0.857 |
| No                    | 579(73.76%) | 188(74.31%) | 391(73.50%) |       |       | 314(65.83%) | 114(68.26%) | 200(64.52%) |       |       | 265(86.04%) | 74(86.05%) | 191(86.04%) |        |       |
| Yes                   | 206(26.24%) | 65(25.69%)  | 141(26.50%) |       |       | 163(34.17%) | 53(31.74%)  | 110(35.48%) |       |       | 43(13.96%)  | 12(13.95%) | 31(13.96%)  |        |       |
| US-BIRADS             |             |             |             | 2.304 | 0.680 |             |             |             | 1.533 | 0.821 |             |            |             | 1.974  | 0.578 |
| 4a                    | 7(0.89%)    | 1(0.40%)    | 6(1.13%)    |       |       | 7(1.47%)    | 1(0.60%)    | 6(1.94%)    |       |       | 0(0.00%)    | 0(0.00%)   | 0(0.00%)    |        |       |
| 4b                    | 17(2.17%)   | 6(2.37%)    | 11(2.06%)   |       |       | 13(2.73%)   | 5(2.99%)    | 8(2.58%)    |       |       | 4(1.30%)    | 1(1.16%)   | 3(1.35%)    |        |       |
| 4c                    | 54(6.88%)   | 14(5.53%)   | 40(7.52%)   |       |       | 34(7.13%)   | 11(6.59%)   | 23(7.42%)   |       |       | 20(6.49%)   | 3(3.49%)   | 17(7.66%)   |        |       |

|                          |             |             |             |       |       |             |             |             |       |       |             |            |             |       |       |
|--------------------------|-------------|-------------|-------------|-------|-------|-------------|-------------|-------------|-------|-------|-------------|------------|-------------|-------|-------|
| 5                        | 320(40.76%) | 103(40.71%) | 217(40.79%) |       |       | 183(38.36%) | 65(38.92%)  | 118(38.06%) |       |       | 137(44.48%) | 38(44.19%) | 99(44.59%)  |       |       |
| 6                        | 387(49.30%) | 129(50.99%) | 258(48.50%) |       |       | 240(50.31%) | 85(50.90%)  | 155(50.00%) |       |       | 147(47.73%) | 44(51.16%) | 103(46.40%) |       |       |
| Clinical T stage         |             |             |             | 0.670 | 0.880 |             |             |             | 2.001 | 0.572 |             |            |             | 2.941 | 0.401 |
| T1                       | 181(23.06%) | 55(21.74%)  | 126(23.68%) |       |       | 67(14.05%)  | 28(16.77%)  | 39(12.57%)  |       |       | 114(37.01%) | 27(31.40%) | 87(39.19%)  |       |       |
| T2                       | 401(51.08%) | 132(52.17%) | 269(50.56%) |       |       | 225(47.17%) | 79(47.31%)  | 146(47.10%) |       |       | 176(57.14%) | 53(61.62%) | 123(55.41%) |       |       |
| T3                       | 130(16.56%) | 44(17.39%)  | 86(16.17%)  |       |       | 114(23.90%) | 38(22.75%)  | 76(24.52%)  |       |       | 16(5.19%)   | 6(6.98%)   | 10(4.50%)   |       |       |
| T4                       | 73(9.30%)   | 22(8.70%)   | 51(9.59%)   |       |       | 71(14.88%)  | 22(13.17%)  | 49(15.81%)  |       |       | 2(0.65%)    | 0(0.00%)   | 2(0.90%)    |       |       |
| Clinical N stage         |             |             |             | 1.899 | 0.594 |             |             |             | 1.130 | 0.770 |             |            |             | 1.101 | 0.777 |
| N0                       | 300(38.22%) | 89(35.18%)  | 211(39.66%) |       |       | 73(15.30%)  | 22(13.17%)  | 51(16.45%)  |       |       | 227(73.70%) | 67(77.91%) | 160(72.07%) |       |       |
| N1                       | 232(29.55%) | 76(30.04%)  | 156(29.32%) |       |       | 164(34.38%) | 60(35.93%)  | 104(33.55%) |       |       | 68(22.08%)  | 16(18.60%) | 52(23.42%)  |       |       |
| N2                       | 160(20.38%) | 54(21.34%)  | 106(19.92%) |       |       | 151(31.66%) | 52(31.14%)  | 99(31.94%)  |       |       | 9(2.92%)    | 2(2.33%)   | 7(3.16%)    |       |       |
| N3                       | 93(11.85%)  | 34(13.44%)  | 59(11.09%)  |       |       | 89(18.66%)  | 33(19.76%)  | 56(18.06%)  |       |       | 4(1.30%)    | 1(1.16%)   | 3(1.35%)    |       |       |
| Clinical TNM stage       |             |             |             | 2.531 | 0.282 |             |             |             | 0.473 | 0.789 |             |            |             | 1.397 | 0.498 |
| I                        | 92(11.72%)  | 24(9.49%)   | 68(12.78%)  |       |       | 14(2.94%)   | 6(3.59%)    | 8(2.58%)    |       |       | 78(25.32%)  | 18(20.93%) | 60(27.03%)  |       |       |
| II                       | 382(48.66%) | 121(47.83%) | 261(49.06%) |       |       | 168(35.22%) | 57(34.13%)  | 111(35.81%) |       |       | 214(69.48%) | 64(74.42%) | 150(67.57%) |       |       |
| III                      | 311(39.62%) | 108(42.68%) | 203(38.26%) |       |       | 295(61.84%) | 104(62.28%) | 191(61.61%) |       |       | 16(5.20%)   | 4(4.65%)   | 12(5.40%)   |       |       |
| Neoadjuvant Chemotherapy |             |             |             |       |       |             |             |             |       |       |             |            |             |       |       |
| Chemotherapy regimen     |             |             |             |       |       |             |             |             | 5.568 | 0.234 |             |            |             |       |       |
| AC/ACF                   |             |             |             |       |       | 28(5.87%)   | 7(4.19%)    | 21(6.77%)   |       |       |             |            |             |       |       |
| CT/ACT                   |             |             |             |       |       | 27(5.66%)   | 9(5.39%)    | 18(5.81%)   |       |       |             |            |             |       |       |
| AT                       |             |             |             |       |       | 223(46.75%) | 87(52.10%)  | 136(43.87%) |       |       |             |            |             |       |       |
| TP                       |             |             |             |       |       | 141(29.56%) | 41(24.55%)  | 100(32.26%) |       |       |             |            |             |       |       |
| Others                   |             |             |             |       |       | 58(12.16%)  | 23(13.77%)  | 35(11.29%)  |       |       |             |            |             |       |       |
| Chemotherapy times       |             |             |             |       |       |             |             |             | 3.765 | 0.052 |             |            |             |       |       |
| <6                       |             |             |             |       |       | 134(28.09%) | 56(33.53%)  | 78(25.16%)  |       |       |             |            |             |       |       |
| ≥6                       |             |             |             |       |       | 343(71.91%) | 111(66.47%) | 232(74.84%) |       |       |             |            |             |       |       |
| Response                 |             |             |             |       |       |             |             |             | 1.799 | 0.615 |             |            |             |       |       |
| CR                       |             |             |             |       |       | 7(1.47%)    | 4(2.40%)    | 3(0.97%)    |       |       |             |            |             |       |       |
| PR                       |             |             |             |       |       | 312(65.41%) | 109(65.26%) | 203(65.48%) |       |       |             |            |             |       |       |

|                           |             |             |             |        |       |             |             |             |        |       |             |            |             |        |       |
|---------------------------|-------------|-------------|-------------|--------|-------|-------------|-------------|-------------|--------|-------|-------------|------------|-------------|--------|-------|
| SD                        |             |             |             |        |       | 151(31.65%) | 51(30.54%)  | 100(32.26%) |        |       |             |            |             |        |       |
| PD                        |             |             |             |        |       | 7(1.47%)    | 3(1.80%)    | 4(1.29%)    |        |       |             |            |             |        |       |
| Miller and Payne grade    |             |             |             |        |       |             |             |             | 14.930 | 0.005 |             |            |             |        |       |
| 1                         |             |             |             |        |       | 22(4.61%)   | 13(7.78%)   | 9(2.90%)    |        |       |             |            |             |        |       |
| 2                         |             |             |             |        |       | 126(26.42%) | 40(23.95%)  | 86(27.74%)  |        |       |             |            |             |        |       |
| 3                         |             |             |             |        |       | 177(37.11%) | 50(29.95%)  | 127(40.98%) |        |       |             |            |             |        |       |
| 4                         |             |             |             |        |       | 62(13.00%)  | 30(17.96%)  | 32(10.32%)  |        |       |             |            |             |        |       |
| 5                         |             |             |             |        |       | 90(18.86%)  | 34(20.36%)  | 56(18.06%)  |        |       |             |            |             |        |       |
| Pathological response     |             |             |             |        |       |             |             |             | 0.231  | 0.631 |             |            |             |        |       |
| pCR                       |             |             |             |        |       | 72(15.09%)  | 27(16.17%)  | 45(14.52%)  |        |       |             |            |             |        |       |
| non-pCR                   |             |             |             |        |       | 405(84.91%) | 140(83.83%) | 265(85.48%) |        |       |             |            |             |        |       |
| Post-chemotherapy regimen |             |             |             | 11.260 | 0.047 |             |             |             | 8.430  | 0.134 |             |            |             | 6.471  | 0.263 |
| AC/ACF                    | 125(15.92%) | 37(14.62%)  | 88(16.54%)  |        |       | 43(9.01%)   | 10(5.99%)   | 33(10.65%)  |        |       | 82(26.62%)  | 27(31.40%) | 55(24.77%)  |        |       |
| CT/ACT                    | 125(15.92%) | 30(11.86%)  | 95(17.86%)  |        |       | 30(6.29%)   | 7(4.19%)    | 23(7.42%)   |        |       | 95(30.84%)  | 23(26.74%) | 72(32.43%)  |        |       |
| AT                        | 97(12.36%)  | 36(14.23%)  | 61(11.47%)  |        |       | 37(7.76%)   | 17(10.18%)  | 20(6.45%)   |        |       | 60(19.48%)  | 19(22.09%) | 41(18.47%)  |        |       |
| TP                        | 61(7.77%)   | 14(5.53%)   | 47(8.83%)   |        |       | 39(8.18%)   | 11(6.59%)   | 28(9.03%)   |        |       | 22(7.14%)   | 3(3.49%)   | 19(8.56%)   |        |       |
| Others                    | 108(13.76%) | 43(17.00%)  | 65(12.22%)  |        |       | 81(16.98%)  | 33(19.76%)  | 48(15.48%)  |        |       | 27(8.78%)   | 10(11.63%) | 17(7.66%)   |        |       |
| NO                        | 269(34.27%) | 93(36.76%)  | 176(33.08%) |        |       | 247(51.78%) | 89(53.29%)  | 158(50.97%) |        |       | 22(7.14%)   | 4(4.65%)   | 18(8.11%)   |        |       |
| Operative time (min)      |             |             |             | 2.776  | 0.096 |             |             |             | 1.600  | 0.206 |             |            |             | 3.995  | 0.046 |
| <90                       | 347(44.20%) | 101(39.92%) | 246(46.24%) |        |       | 253(53.04%) | 82(49.10%)  | 171(55.16%) |        |       | 94(30.52%)  | 19(22.09%) | 75(33.78%)  |        |       |
| ≥90                       | 438(55.80%) | 152(60.08%) | 286(53.76%) |        |       | 224(46.96%) | 85(50.90%)  | 139(44.84%) |        |       | 214(69.48%) | 67(77.91%) | 147(66.22%) |        |       |
| Type of surgery           |             |             |             | 7.150  | 0.008 |             |             |             | 0.594  | 0.441 |             |            |             | 5.939  | 0.015 |
| Mastectomy                | 606(77.20%) | 210(83.00%) | 396(74.44%) |        |       | 406(85.12%) | 145(86.83%) | 261(84.19%) |        |       | 200(64.94%) | 65(75.58%) | 135(60.81%) |        |       |
| Breast-conserving surgery | 179(22.80%) | 43(17.00%)  | 136(25.56%) |        |       | 71(14.88%)  | 22(13.17%)  | 49(15.81%)  |        |       | 108(35.06%) | 21(24.42%) | 87(39.19%)  |        |       |
| Tumor size (cm)           |             |             |             | 5.975  | 0.050 |             |             |             | 1.401  | 0.496 |             |            |             | 10.880 | 0.004 |
| ≤2cm                      | 437(55.67%) | 131(51.78%) | 306(57.52%) |        |       | 263(55.14%) | 92(55.09%)  | 171(55.16%) |        |       | 174(56.50%) | 39(45.35%) | 135(60.81%) |        |       |
| >2 and <5cm               | 299(38.09%) | 99(39.13%)  | 200(37.59%) |        |       | 172(36.06%) | 57(34.13%)  | 115(37.10%) |        |       | 127(41.23%) | 42(48.84%) | 85(38.29%)  |        |       |
| ≥5cm                      | 49(6.24%)   | 23(9.09%)   | 26(4.89%)   |        |       | 42(8.80%)   | 18(10.78%)  | 24(7.74%)   |        |       | 7(2.27%)    | 5(5.81%)   | 2(0.90%)    |        |       |
| Histologic type           |             |             |             | 0.982  | 0.612 |             |             |             | 2.473  | 0.290 |             |            |             | 0.464  | 0.793 |

|                                 |             |             |             |        |       |             |             |             |       |       |             |            |             |        |       |
|---------------------------------|-------------|-------------|-------------|--------|-------|-------------|-------------|-------------|-------|-------|-------------|------------|-------------|--------|-------|
| Ductal                          | 758(96.56%) | 245(96.83%) | 513(96.43%) |        |       | 461(96.64%) | 163(97.60%) | 298(96.13%) |       |       | 297(96.43%) | 82(95.35%) | 215(96.85%) |        |       |
| Lobular                         | 13(1.66%)   | 5(1.98%)    | 8(1.50%)    |        |       | 7(1.47%)    | 3(1.80%)    | 4(1.29%)    |       |       | 6(1.95%)    | 2(2.33%)   | 4(1.80%)    |        |       |
| Others                          | 14(1.78%)   | 3(1.19%)    | 11(2.07%)   |        |       | 9(1.89%)    | 1(0.60%)    | 8(2.58%)    |       |       | 5(1.62%)    | 2(2.33%)   | 3(1.35%)    |        |       |
| Histologic grade                |             |             |             | 0.197  | 0.906 |             |             |             | 1.592 | 0.451 |             |            |             | 5.040  | 0.081 |
| I                               | 133(16.94%) | 45(17.78%)  | 88(16.54%)  |        |       | 108(22.64%) | 34(20.36%)  | 74(23.87%)  |       |       | 25(8.12%)   | 11(12.79%) | 14(6.31%)   |        |       |
| II                              | 431(54.90%) | 138(54.55%) | 293(55.08%) |        |       | 244(51.15%) | 84(50.30%)  | 160(51.61%) |       |       | 187(60.71%) | 54(62.79%) | 133(59.91%) |        |       |
| III                             | 221(28.15%) | 70(27.67%)  | 151(28.38%) |        |       | 125(26.21%) | 49(29.34%)  | 76(24.52%)  |       |       | 96(31.17%)  | 21(24.42%) | 75(33.78%)  |        |       |
| Pathological TNM classification |             |             |             |        |       |             |             |             |       |       |             |            |             |        |       |
| Pathological T stage            |             |             |             | 13.330 | 0.010 |             |             |             | 7.809 | 0.099 |             |            |             | 11.350 | 0.023 |
| Tis/T0                          | 92(11.72%)  | 34(13.44%)  | 58(10.90%)  |        |       | 88(18.45%)  | 33(19.76%)  | 55(17.74%)  |       |       | 4(1.30%)    | 1(1.16%)   | 3(1.35%)    |        |       |
| T1                              | 302(38.47%) | 92(36.36%)  | 210(39.47%) |        |       | 190(39.83%) | 69(41.32%)  | 121(39.03%) |       |       | 112(36.36%) | 23(26.74%) | 89(40.09%)  |        |       |
| T2                              | 326(41.53%) | 94(37.15%)  | 232(43.61%) |        |       | 149(31.24%) | 41(24.55%)  | 108(34.84%) |       |       | 177(57.47%) | 53(61.63%) | 124(55.86%) |        |       |
| T3                              | 45(5.73%)   | 23(9.10%)   | 22(4.14%)   |        |       | 34(7.13%)   | 16(9.58%)   | 18(5.81%)   |       |       | 11(3.57%)   | 7(8.14%)   | 4(1.80%)    |        |       |
| T4                              | 20(2.55%)   | 10(3.95%)   | 10(1.88%)   |        |       | 16(3.35%)   | 8(4.79%)    | 8(2.58%)    |       |       | 4(1.30%)    | 2(2.33%)   | 2(0.90%)    |        |       |
| Pathological N stage            |             |             |             | 5.753  | 0.124 |             |             |             | 2.557 | 0.465 |             |            |             | 2.639  | 0.451 |
| N0                              | 326(41.53%) | 99(39.13%)  | 227(42.67%) |        |       | 176(36.90%) | 60(35.93%)  | 116(37.42%) |       |       | 150(48.70%) | 39(45.35%) | 111(50.00%) |        |       |
| N1                              | 175(22.29%) | 48(18.97%)  | 127(23.87%) |        |       | 101(21.17%) | 30(17.96%)  | 71(22.90%)  |       |       | 74(24.03%)  | 18(20.93%) | 56(25.23%)  |        |       |
| N2                              | 122(15.54%) | 46(18.18%)  | 76(14.29%)  |        |       | 77(16.14%)  | 31(18.56%)  | 46(14.84%)  |       |       | 45(14.61%)  | 15(17.44%) | 30(13.51%)  |        |       |
| N3                              | 162(20.64%) | 60(23.72%)  | 102(19.17%) |        |       | 123(25.79%) | 46(27.55%)  | 77(24.84%)  |       |       | 39(12.66%)  | 14(16.28%) | 25(11.26%)  |        |       |
| Pathological TNM stage          |             |             |             | 9.303  | 0.026 |             |             |             | 6.677 | 0.083 |             |            |             | 4.817  | 0.186 |
| Tis/T0                          | 74(9.43%)   | 26(10.28%)  | 48(9.02%)   |        |       | 71(14.88%)  | 25(14.97%)  | 46(14.84%)  |       |       | 3(0.97%)    | 1(1.16%)   | 2(0.90%)    |        |       |
| I                               | 157(20.00%) | 47(18.58%)  | 110(20.68%) |        |       | 83(17.40%)  | 32(19.16%)  | 51(16.45%)  |       |       | 74(24.03%)  | 15(17.44%) | 59(26.58%)  |        |       |
| II                              | 262(33.38%) | 69(27.27%)  | 193(36.28%) |        |       | 118(24.74%) | 30(17.96%)  | 88(28.39%)  |       |       | 144(46.75%) | 39(45.35%) | 105(47.30%) |        |       |
| III                             | 292(37.20%) | 111(43.87%) | 181(34.02%) |        |       | 205(42.98%) | 80(47.91%)  | 125(40.32%) |       |       | 87(28.25%)  | 31(36.05%) | 56(25.23%)  |        |       |
| Total lymph nodes               |             |             |             | 2.325  | 0.127 |             |             |             | 2.587 | 1.608 |             |            |             | 1.216  | 0.270 |
| <21                             | 391(49.81%) | 136(53.75%) | 255(47.93%) |        |       | 202(42.35%) | 79(47.31%)  | 123(39.68%) |       |       | 189(61.36%) | 57(66.28%) | 132(59.46%) |        |       |
| ≥21                             | 394(50.19%) | 117(46.25%) | 277(52.07%) |        |       | 275(57.65%) | 88(52.69%)  | 187(60.32%) |       |       | 119(38.64%) | 29(33.72%) | 90(40.54%)  |        |       |
| Positive lymph nodes            |             |             |             | 0.872  | 0.350 |             |             |             | 0.280 | 0.597 |             |            |             | 0.229  | 0.632 |
| <1                              | 329(41.91%) | 100(39.53%) | 229(43.05%) |        |       | 179(37.53%) | 60(35.93%)  | 119(38.39%) |       |       | 150(48.70%) | 40(46.51%) | 110(49.55%) |        |       |

|                                  |             |             |             |       |       |             |             |             |       |       |             |            |             |       |       |
|----------------------------------|-------------|-------------|-------------|-------|-------|-------------|-------------|-------------|-------|-------|-------------|------------|-------------|-------|-------|
| ≥1                               | 456(58.09%) | 153(60.47%) | 303(56.95%) |       |       | 298(62.47%) | 107(64.07%) | 191(61.61%) |       |       | 158(51.30%) | 46(53.49%) | 112(50.45%) |       |       |
| Total axillary lymph nodes       |             |             |             | 0.500 | 0.480 |             |             |             | 1.726 | 0.189 |             |            |             | 0.048 | 0.827 |
| <20                              | 389(49.55%) | 130(51.38%) | 259(48.68%) |       |       | 195(40.88%) | 75(44.91%)  | 120(38.71%) |       |       | 194(62.99%) | 55(63.95%) | 139(62.61%) |       |       |
| ≥20                              | 396(50.45%) | 123(48.62%) | 273(51.32%) |       |       | 282(59.12%) | 92(55.09%)  | 190(61.29%) |       |       | 114(37.01%) | 31(36.05%) | 83(37.39%)  |       |       |
| Positive axillary lymph nodes    |             |             |             | 2.160 | 0.142 |             |             |             | 0.289 | 0.591 |             |            |             | 1.587 | 0.208 |
| <1                               | 343(43.69%) | 101(39.92%) | 242(45.49%) |       |       | 182(38.16%) | 61(36.53%)  | 121(39.03%) |       |       | 161(52.27%) | 40(46.51%) | 121(54.50%) |       |       |
| ≥1                               | 442(56.31%) | 152(60.08%) | 290(54.51%) |       |       | 295(61.84%) | 106(63.47%) | 189(60.97%) |       |       | 147(47.73%) | 46(53.49%) | 101(45.50%) |       |       |
| Postoperative complications      |             |             |             | 0.012 | 0.913 |             |             |             | 0.007 | 0.936 |             |            |             | 0.002 | 0.966 |
| No                               | 728(92.74%) | 235(92.89%) | 493(92.67%) |       |       | 449(94.13%) | 157(94.01%) | 292(94.19%) |       |       | 279(90.58%) | 78(90.70%) | 201(90.54%) |       |       |
| Yes                              | 57(7.26%)   | 18(7.11%)   | 39(7.33%)   |       |       | 28(5.87%)   | 10(5.99%)   | 18(5.81%)   |       |       | 29(9.42%)   | 8(9.30%)   | 21(9.46%)   |       |       |
| Postoperative chemotherapy       |             |             |             | 1.029 | 0.311 |             |             |             | 0.235 | 0.628 |             |            |             | 1.117 | 0.291 |
| No                               | 269(34.27%) | 93(36.76%)  | 176(33.08%) |       |       | 247(51.78%) | 89(53.29%)  | 158(50.97%) |       |       | 22(7.14%)   | 4(4.65%)   | 18(8.11%)   |       |       |
| Yes                              | 516(65.73%) | 160(63.24%) | 356(66.92%) |       |       | 230(48.22%) | 78(46.71%)  | 152(49.03%) |       |       | 286(92.86%) | 82(95.35%) | 204(91.89%) |       |       |
| Postoperative chemotherapy times |             |             |             | 3.072 | 0.080 |             |             |             | 2.183 | 0.140 |             |            |             | 2.005 | 0.157 |
| <4                               | 374(47.64%) | 132(52.17%) | 242(45.49%) |       |       | 340(71.28%) | 126(75.45%) | 214(69.03%) |       |       | 34(11.04%)  | 6(6.98%)   | 28(12.61%)  |       |       |
| ≥4                               | 411(52.36%) | 121(47.83%) | 290(54.51%) |       |       | 137(28.72%) | 41(24.55%)  | 96(30.97%)  |       |       | 274(88.96%) | 80(93.02%) | 194(87.39%) |       |       |
| Postoperative radiotherapy       |             |             |             | 0.726 | 0.394 |             |             |             | 0.088 | 0.767 |             |            |             | 1.054 | 0.305 |
| No                               | 196(24.97%) | 68(26.88%)  | 128(24.06%) |       |       | 119(24.95%) | 43(25.75%)  | 76(24.52%)  |       |       | 77(25.00%)  | 25(29.07%) | 52(23.42%)  |       |       |
| Yes                              | 589(75.03%) | 185(73.12%) | 404(75.94%) |       |       | 358(75.05%) | 124(74.25%) | 234(75.48%) |       |       | 231(75.00%) | 61(70.93%) | 170(76.58%) |       |       |
| Postoperative endocrine therapy  |             |             |             | 0.274 | 0.601 |             |             |             | 0.169 | 0.681 |             |            |             | 0.592 | 0.442 |
| No                               | 302(38.47%) | 94(37.15%)  | 208(39.10%) |       |       | 206(43.19%) | 70(41.92%)  | 136(43.87%) |       |       | 96(31.17%)  | 24(27.91%) | 72(32.43%)  |       |       |
| Yes                              | 483(61.53%) | 159(62.85%) | 324(60.90%) |       |       | 271(56.81%) | 97(58.08%)  | 174(56.13%) |       |       | 212(68.83%) | 62(72.09%) | 150(67.57%) |       |       |
| Postoperative targeted therapy   |             |             |             | 1.137 | 0.286 |             |             |             | 1.993 | 0.158 |             |            |             | 0.090 | 0.765 |
| No                               | 583(74.27%) | 194(76.68%) | 389(73.12%) |       |       | 332(69.60%) | 123(73.65%) | 209(67.42%) |       |       | 251(81.49%) | 71(82.56%) | 180(81.08%) |       |       |
| Yes                              | 202(25.73%) | 59(23.32%)  | 143(26.88%) |       |       | 145(30.40%) | 44(26.35%)  | 101(32.58%) |       |       | 57(18.51%)  | 15(17.44%) | 42(18.92%)  |       |       |
