# Supplementary material for: Prognostic Nutritional Index (PNI) in Patients With Breast Cancer Treated With Neoadjuvant Chemotherapy as a Useful Prognostic Indicator
Source: PubMed Central journal article supplement (PMC8042235; doi:10.3389/fcell.2021.656741), 2021-03-30
Supplement: Table_2.pdf [file Table_2.pdf]

Supplementary Table 2 The correlations between nutritional parameters / blood parameters and PNI

| Parameters   | N           | PNI 785     |              |          |         | N           | PNI 477     |              |          |         | N           | PNI 308    |              |          |         |
|--------------|-------------|-------------|--------------|----------|---------|-------------|-------------|--------------|----------|---------|-------------|------------|--------------|----------|---------|
| Cases (n)    | 785         | Low PNI 253 | High PNI 532 | $\chi^2$ | P value |             | Low PNI 167 | High PNI 310 | $\chi^2$ | P value |             | Low PNI 86 | High PNI 222 | $\chi^2$ | P value |
| ALT (U/L)    |             |             |              | 0.356    | 0.551   |             |             |              | 0.379    | 0.538   |             |            |              | 0.236    | 0.627   |
| <15          | 370(47.13%) | 123(48.62%) | 247(46.43%)  |          |         | 208(43.61%) | 76(45.51%)  | 132(42.58%)  |          |         | 162(52.60%) | 47(54.65%) | 115(51.80%)  |          |         |
| ≥15          | 416(52.99%) | 130(51.38%) | 286(53.76%)  |          |         | 269(56.39%) | 91(54.49%)  | 178(57.42%)  |          |         | 147(47.73%) | 39(45.35%) | 108(48.65%)  |          |         |
| AST (U/L)    |             |             |              | 0.890    | 0.345   |             |             |              | 0.048    | 0.827   |             |            |              | 2.637    | 0.104   |
| <18          | 378(48.15%) | 128(50.59%) | 250(46.99%)  |          |         | 211(44.23%) | 75(44.91%)  | 136(43.87%)  |          |         | 167(54.22%) | 53(61.63%) | 114(51.35%)  |          |         |
| ≥18          | 407(51.85%) | 125(49.41%) | 282(53.01%)  |          |         | 266(55.77%) | 92(55.09%)  | 174(56.13%)  |          |         | 141(45.78%) | 33(38.37%) | 108(48.65%)  |          |         |
| LDH (U/L)    |             |             |              | 0.543    | 0.461   |             |             |              | 0.007    | 0.933   |             |            |              | 3.188    | 0.074   |
| <167         | 376(47.90%) | 126(49.80%) | 250(46.99%)  |          |         | 193(40.46%) | 68(40.72%)  | 125(40.32%)  |          |         | 183(59.42%) | 58(67.44%) | 125(56.31%)  |          |         |
| ≥167         | 409(52.10%) | 127(50.20%) | 282(53.01%)  |          |         | 284(59.54%) | 99(59.28%)  | 185(59.68%)  |          |         | 125(40.58%) | 28(32.56%) | 97(43.69%)   |          |         |
| GGT (U/L)    |             |             |              | 2.363    | 0.124   |             |             |              | 0.001    | 0.989   |             |            |              | 8.544    | 0.004   |
| <17          | 366(46.62%) | 128(50.59%) | 238(44.74%)  |          |         | 203(42.56%) | 71(42.51%)  | 132(42.58%)  |          |         | 163(52.92%) | 57(66.28%) | 106(47.75%)  |          |         |
| ≥17          | 419(53.38%) | 125(49.41%) | 294(55.26%)  |          |         | 274(57.44%) | 96(57.49%)  | 178(57.42%)  |          |         | 145(47.08%) | 29(33.72%) | 116(52.25%)  |          |         |
| ALP (U/L)    |             |             |              | 0.706    | 0.401   |             |             |              | 0.236    | 0.627   |             |            |              | 0.627    | 0.428   |
| <64          | 377(48.03%) | 127(50.20%) | 250(46.99%)  |          |         | 227(47.59%) | 82(49.10%)  | 145(46.77%)  |          |         | 150(48.70%) | 45(52.33%) | 105(47.30%)  |          |         |
| ≥64          | 408(51.97%) | 126(49.80%) | 282(53.01%)  |          |         | 250(52.41%) | 85(50.90%)  | 165(53.23%)  |          |         | 158(51.30%) | 41(47.67%) | 117(52.70%)  |          |         |
| GLU (mmol/L) |             |             |              | 0.024    | 0.877   |             |             |              | 0.755    | 0.385   |             |            |              | 2.497    | 0.114   |
| <5.33        | 391(49.81%) | 125(49.41%) | 266(50.00%)  |          |         | 247(51.78%) | 91(54.49%)  | 156(50.32%)  |          |         | 144(46.75%) | 34(39.53%) | 110(49.55%)  |          |         |
| ≥5.33        | 394(50.19%) | 128(50.59%) | 266(50.00%)  |          |         | 230(48.22%) | 76(45.51%)  | 154(49.68%)  |          |         | 164(53.25%) | 52(60.47%) | 112(50.45%)  |          |         |
| IgA (g/L)    |             |             |              | 0.572    | 0.500   |             |             |              | 0.894    | 0.344   |             |            |              | 0.015    | 0.901   |
| <2.30        | 388(49.43%) | 130(51.38%) | 258(48.50%)  |          |         | 243(50.94%) | 90(53.89%)  | 153(49.35%)  |          |         | 145(47.08%) | 40(46.51%) | 105(47.30%)  |          |         |
| ≥2.30        | 397(50.57%) | 123(48.62%) | 274(51.50%)  |          |         | 234(49.06%) | 77(46.11%)  | 157(50.65%)  |          |         | 163(52.92%) | 46(53.49%) | 117(52.70%)  |          |         |
| IgG (g/L)    |             |             |              | 5.675    | 0.017   |             |             |              | 3.276    | 0.070   |             |            |              | 2.544    | 0.111   |
| <11.70       | 386(49.17%) | 140(55.34%) | 246(46.24%)  |          |         | 233(48.85%) | 91(54.49%)  | 142(45.81%)  |          |         | 153(49.68%) | 49(56.98%) | 104(46.85%)  |          |         |
| ≥11.70       | 399(50.83%) | 113(44.66%) | 286(53.76%)  |          |         | 244(51.15%) | 76(45.51%)  | 168(54.19%)  |          |         | 155(50.32%) | 37(43.02%) | 118(53.15%)  |          |         |
| IgM (g/L)    |             |             |              | 0.038    | 0.846   |             |             |              | 3.380    | 0.066   |             |            |              | 5.171    | 0.023   |

|              |             |             |             |         |         |             |             |             |         |         |             |            |             |        |         |
|--------------|-------------|-------------|-------------|---------|---------|-------------|-------------|-------------|---------|---------|-------------|------------|-------------|--------|---------|
| <1.10        | 387(49.30%) | 126(49.80%) | 261(49.06%) |         |         | 244(51.15%) | 95(56.89%)  | 149(48.06%) |         |         | 143(46.43%) | 31(36.05%) | 112(50.45%) |        |         |
| ≥1.10        | 398(50.70%) | 127(50.20%) | 271(50.94%) |         |         | 233(48.85%) | 72(43.11%)  | 161(51.94%) |         |         | 165(53.57%) | 55(63.95%) | 110(49.55%) |        |         |
| ALB (g/L)    |             |             |             | 241.100 | <0.0001 |             |             |             | 184.400 | <0.0001 |             |            |             | 62.690 | <0.0001 |
| <45.2        | 392(49.94%) | 228(90.12%) | 164(30.83%) |         |         | 235(49.27%) | 153(91.62%) | 82(26.45%)  |         |         | 157(50.97%) | 75(87.21%) | 82(36.94%)  |        |         |
| ≥45.2        | 393(50.06%) | 25(9.88%)   | 368(69.17%) |         |         | 242(50.73%) | 14(8.38%)   | 228(73.55%) |         |         | 151(49.03%) | 11(12.79%) | 140(63.06%) |        |         |
| CRP (mg/dl)  |             |             |             | 2.703   | 0.100   |             |             |             | 9.251   | 0.002   |             |            |             | 4.472  | 0.035   |
| <0.2         | 384(48.92%) | 113(44.66%) | 271(50.94%) |         |         | 187(39.20%) | 50(29.94%)  | 137(44.19%) |         |         | 197(63.96%) | 63(73.26%) | 134(60.36%) |        |         |
| ≥0.2         | 401(51.08%) | 140(55.34%) | 261(49.06%) |         |         | 290(60.80%) | 117(70.06%) | 173(55.81%) |         |         | 111(36.04%) | 23(26.74%) | 88(39.64%)  |        |         |
| CA125 (U/ml) |             |             |             | 0.128   | 0.721   |             |             |             | 0.005   | 0.943   |             |            |             | 0.036  | 0.849   |
| <13.35       | 392(49.94%) | 124(49.01%) | 268(50.38%) |         |         | 221(46.33%) | 77(46.11%)  | 144(46.45%) |         |         | 171(55.52%) | 47(54.65%) | 124(55.86%) |        |         |
| ≥13.35       | 393(50.06%) | 129(50.99%) | 264(49.62%) |         |         | 256(53.67%) | 90(53.89%)  | 166(53.55%) |         |         | 137(44.48%) | 39(45.35%) | 98(44.14%)  |        |         |
| CA153 (U/ml) |             |             |             | 0.937   | 0.333   |             |             |             | 1.270   | 0.260   |             |            |             | 0.177  | 0.674   |
| <11.63       | 392(49.94%) | 120(47.43%) | 272(51.13%) |         |         | 208(43.61%) | 67(40.12%)  | 141(45.48%) |         |         | 184(59.74%) | 53(61.63%) | 131(59.01%) |        |         |
| ≥11.63       | 393(50.06%) | 133(52.57%) | 260(48.87%) |         |         | 269(56.39%) | 100(59.88%) | 169(54.52%) |         |         | 124(40.26%) | 33(38.37%) | 91(40.99%)  |        |         |
| CEA (ng/ml)  |             |             |             | 0.064   | 0.780   |             |             |             | 0.056   | 0.813   |             |            |             | 1.493  | 0.222   |
| <1.66        | 392(49.94%) | 128(50.59%) | 264(49.62%) |         |         | 212(44.44%) | 73(43.71%)  | 139(44.84%) |         |         | 180(58.44%) | 55(63.95%) | 125(56.31%) |        |         |
| ≥1.66        | 393(50.06%) | 125(49.41%) | 268(50.38%) |         |         | 265(55.56%) | 94(56.29%)  | 171(55.16%) |         |         | 128(41.56%) | 31(36.05%) | 97(43.69%)  |        |         |
| D-D (mg/L)   |             |             |             | 3.209   | 0.073   |             |             |             | 1.372   | 0.242   |             |            |             | 0.699  | 0.403   |
| <0.29        | 387(49.30%) | 113(44.66%) | 274(51.50%) |         |         | 200(41.93%) | 64(38.32%)  | 136(43.87%) |         |         | 187(60.71%) | 49(56.98%) | 138(62.16%) |        |         |
| ≥0.29        | 398(50.70%) | 140(55.34%) | 258(48.50%) |         |         | 277(58.07%) | 103(61.68%) | 174(56.13%) |         |         | 121(39.29%) | 37(43.02%) | 84(37.84%)  |        |         |
| FIB (g/L)    |             |             |             | 0.595   | 0.441   |             |             |             | 1.631   | 0.202   |             |            |             | 0.579  | 0.447   |
| <2.85        | 388(49.43%) | 120(47.43%) | 268(50.38%) |         |         | 216(45.28%) | 69(41.32%)  | 147(47.42%) |         |         | 172(55.84%) | 51(59.30%) | 121(54.50%) |        |         |
| ≥2.85        | 397(50.57%) | 133(52.57%) | 264(49.62%) |         |         | 261(54.72%) | 98(58.68%)  | 163(52.58%) |         |         | 136(44.16%) | 35(40.70%) | 101(45.50%) |        |         |
| INR (INR)    |             |             |             | 0.949   | 0.330   |             |             |             | 2.547   | 0.111   |             |            |             | 0.154  | 0.695   |
| <0.93        | 365(46.50%) | 124(49.01%) | 241(45.30%) |         |         | 177(37.11%) | 70(41.92%)  | 107(34.52%) |         |         | 188(61.04%) | 54(62.79%) | 134(60.36%) |        |         |
| ≥0.93        | 420(53.50%) | 129(50.99%) | 291(54.70%) |         |         | 300(62.89%) | 97(58.08%)  | 203(65.48%) |         |         | 120(38.96%) | 32(37.21%) | 88(39.64%)  |        |         |
| FDP (ug/ml)  |             |             |             | 2.018   | 0.155   |             |             |             | 1.601   | 0.206   |             |            |             | 0.659  | 0.417   |
| <1.40        | 367(46.75%) | 109(43.08%) | 258(48.50%) |         |         | 137(28.72%) | 42(25.15%)  | 95(30.65%)  |         |         | 230(74.68%) | 67(77.91%) | 163(73.42%) |        |         |
| ≥1.40        | 418(53.25%) | 144(56.92%) | 274(51.50%) |         |         | 340(71.28%) | 125(74.85%) | 215(69.35%) |         |         | 78(25.32%)  | 19(22.09%) | 59(26.58%)  |        |         |

|                                           |             |             |             |        |         |             |             |             |        |         |             |            |             |        |        |
|-------------------------------------------|-------------|-------------|-------------|--------|---------|-------------|-------------|-------------|--------|---------|-------------|------------|-------------|--------|--------|
| White blood cell (W) ( $\times 10^9/L$ )  |             |             |             | 31.300 | <0.0001 |             |             |             | 25.540 | <0.0001 |             |            |             | 6.609  | 0.010  |
| <6.01                                     | 389(49.55%) | 162(64.03%) | 227(42.67%) |        |         | 239(50.10%) | 110(65.87%) | 129(41.61%) |        |         | 150(48.70%) | 52(60.47%) | 98(44.14%)  |        |        |
| $\geq 6.01$                               | 396(50.45%) | 91(35.97%)  | 305(57.33%) |        |         | 238(49.90%) | 57(34.13%)  | 181(58.39%) |        |         | 158(51.30%) | 34(39.53%) | 124(55.86%) |        |        |
| Red blood cell (R) ( $\times 10^{12}/L$ ) |             |             |             | 26.380 | <0.0001 |             |             |             | 19.040 | <0.0001 |             |            |             | 7.808  | 0.005  |
| <4.40                                     | 389(49.55%) | 159(62.85%) | 230(43.23%) |        |         | 235(49.27%) | 105(62.87%) | 130(41.94%) |        |         | 154(50.00%) | 54(62.79%) | 100(45.05%) |        |        |
| $\geq 4.40$                               | 396(50.45%) | 94(37.15%)  | 302(56.77%) |        |         | 242(50.73%) | 62(37.13%)  | 180(58.06%) |        |         | 154(50.00%) | 32(37.21%) | 122(54.95%) |        |        |
| Hemoglobin (Hb) ( $\times 10^9/L$ )       |             |             |             | 37.140 | <0.0001 |             |             |             | 21.100 | <0.0001 |             |            |             | 15.030 | 0.0001 |
| <132                                      | 382(48.66%) | 163(64.43%) | 219(41.17%) |        |         | 243(50.94%) | 109(65.27%) | 134(43.23%) |        |         | 139(45.13%) | 54(62.79%) | 85(38.29%)  |        |        |
| $\geq 132$                                | 403(51.34%) | 90(35.57%)  | 313(58.83%) |        |         | 234(49.06%) | 58(34.73%)  | 176(56.77%) |        |         | 169(54.87%) | 32(37.21%) | 137(61.71%) |        |        |
| Neutrophil (N) ( $\times 10^9/L$ )        |             |             |             | 8.124  | 0.004   |             |             |             | 7.056  | 0.008   |             |            |             | 1.949  | 0.163  |
| <3.68                                     | 392(49.94%) | 145(57.31%) | 247(46.43%) |        |         | 229(48.01%) | 94(56.29%)  | 135(43.55%) |        |         | 163(52.92%) | 51(59.30%) | 112(50.45%) |        |        |
| $\geq 3.68$                               | 393(50.06%) | 108(42.69%) | 285(53.57%) |        |         | 248(51.99%) | 73(43.71%)  | 175(56.45%) |        |         | 145(47.08%) | 35(40.70%) | 110(49.55%) |        |        |
| Lymphocyte (L) ( $\times 10^9/L$ )        |             |             |             | 19.600 | <0.0001 |             |             |             | 17.430 | <0.0001 |             |            |             | 2.261  | 0.133  |
| <1.76                                     | 391(49.81%) | 155(61.26%) | 236(44.36%) |        |         | 258(54.09%) | 112(67.07%) | 146(47.10%) |        |         | 133(43.18%) | 43(50.00%) | 90(40.54%)  |        |        |
| $\geq 1.76$                               | 394(50.19%) | 98(38.74%)  | 296(55.64%) |        |         | 219(45.91%) | 55(32.93%)  | 164(52.90%) |        |         | 175(56.82%) | 43(50.00%) | 132(59.46%) |        |        |
| Monocyte (M) ( $\times 10^9/L$ )          |             |             |             | 5.788  | 0.016   |             |             |             | 1.512  | 0.219   |             |            |             | 6.248  | 0.012  |
| <0.35                                     | 367(46.75%) | 134(52.96%) | 233(43.80%) |        |         | 216(45.28%) | 82(49.10%)  | 134(43.23%) |        |         | 151(49.03%) | 52(60.47%) | 99(44.59%)  |        |        |
| $\geq 0.35$                               | 418(53.25%) | 119(47.04%) | 299(56.20%) |        |         | 261(54.72%) | 85(50.90%)  | 176(56.77%) |        |         | 157(50.97%) | 34(39.53%) | 123(55.41%) |        |        |
| Eosinophils (E) ( $\times 10^9/L$ )       |             |             |             | 2.713  | 0.100   |             |             |             | 2.005  | 0.157   |             |            |             | 1.801  | 0.180  |
| <0.06                                     | 356(45.35%) | 104(41.11%) | 252(47.37%) |        |         | 241(50.52%) | 77(46.11%)  | 164(52.90%) |        |         | 115(37.34%) | 27(31.40%) | 88(39.64%)  |        |        |
| $\geq 0.06$                               | 429(54.65%) | 149(58.89%) | 280(52.63%) |        |         | 236(49.48%) | 90(53.89%)  | 146(47.10%) |        |         | 193(62.66%) | 59(68.60%) | 134(60.36%) |        |        |
| Basophils (B) ( $\times 10^9/L$ )         |             |             |             | 8.078  | 0.005   |             |             |             | 8.100  | 0.004   |             |            |             | 0.929  | 0.335  |
| <0.02                                     | 224(28.54%) | 89(35.18%)  | 135(25.38%) |        |         | 136(28.51%) | 61(36.53%)  | 75(24.19%)  |        |         | 88(28.57%)  | 28(32.56%) | 60(27.03%)  |        |        |
| $\geq 0.02$                               | 561(71.46%) | 164(64.82%) | 397(74.62%) |        |         | 341(71.49%) | 106(63.47%) | 235(75.81%) |        |         | 220(71.43%) | 58(67.44%) | 162(72.97%) |        |        |
| Platelet (P) ( $\times 10^9/L$ )          |             |             |             | 11.240 | 0.001   |             |             |             | 8.975  | 0.003   |             |            |             | 3.367  | 0.067  |
| <243                                      | 388(49.43%) | 147(58.10%) | 241(45.30%) |        |         | 224(46.96%) | 94(56.29%)  | 130(41.94%) |        |         | 164(53.25%) | 53(61.63%) | 111(50.00%) |        |        |
| $\geq 243$                                | 397(50.57%) | 106(41.90%) | 291(54.70%) |        |         | 253(53.04%) | 73(43.71%)  | 180(58.06%) |        |         | 144(46.75%) | 33(38.37%) | 111(50.00%) |        |        |
