# Supplementary material for: Prognostic Nutritional Index (PNI) in Patients With Breast Cancer Treated With Neoadjuvant Chemotherapy as a Useful Prognostic Indicator
Source: PubMed Central journal article supplement (PMC8042235; doi:10.3389/fcell.2021.656741), 2021-03-30
Supplement: Table_3.pdf [file Table_3.pdf]

Supplementary Table 3 Univariate and multivariate Cox regression survival analyses of the SII for the prediction of DFS and OS in breast cancer patients

| Parameters          | DFS                  |         |                       |         | OS                   |         |                       |         |
|---------------------|----------------------|---------|-----------------------|---------|----------------------|---------|-----------------------|---------|
|                     | Univariate analysis  |         | Multivariate analysis |         | Univariate analysis  |         | Multivariate analysis |         |
|                     | Hazard ratio (95%CI) | P value | Hazard ratio (95%CI)  | P value | Hazard ratio (95%CI) | P value | Hazard ratio (95%CI)  | P value |
| Age (year)          |                      | 0.539   |                       |         |                      | 0.975   |                       |         |
| < 47                | 1(reference)         |         |                       |         | 1(reference)         |         |                       |         |
| ≥47                 | 0.897(0.636-1.266)   |         |                       |         | 0.994(0.703-1.406)   |         |                       |         |
| Marital status      |                      | 0.554   |                       |         |                      | 0.577   |                       |         |
| Married             | 1(reference)         |         |                       |         | 1(reference)         |         |                       |         |
| Unmarried           | 0.801(0.384-1.667)   |         |                       |         | 0.808(0.383-1.704)   |         |                       |         |
| Occupation          |                      | 0.862   |                       |         |                      | 0.497   |                       |         |
| Mental worker       | 1(reference)         |         |                       |         | 1(reference)         |         |                       |         |
| Manual worker       | 1.023(0.715-1.463)   |         |                       |         | 0.855(0.598-1.223)   |         |                       |         |
| Others              | 1.079(0.818-1.423)   |         |                       |         | 1.077(0.812-1.429)   |         |                       |         |
| Weight (Kg)         |                      | 0.106   |                       |         |                      | 0.192   |                       |         |
| < 62.00             | 1(reference)         |         |                       |         | 1(reference)         |         |                       |         |
| ≥62.00              | 1.372(0.934-2.017)   |         |                       |         | 1.304(0.874-1.946)   |         |                       |         |
| Height (m)          |                      | 0.584   |                       |         |                      | 0.658   |                       |         |
| < 1.60              | 1(reference)         |         |                       |         | 1(reference)         |         |                       |         |
| ≥1.60               | 0.925(0.700-1.221)   |         |                       |         | 0.937(0.705-1.246)   |         |                       |         |
| BMI                 |                      | 0.371   |                       |         |                      | 0.781   |                       |         |
| < 24.00             | 1(reference)         |         |                       |         | 1(reference)         |         |                       |         |
| ≥24.00              | 0.837(0.567-1.235)   |         |                       |         | 0.944(0.631-1.412)   |         |                       |         |
| Family history      |                      | 0.443   |                       |         |                      | 0.982   |                       |         |
| No                  | 1(reference)         |         |                       |         | 1(reference)         |         |                       |         |
| Yes                 | 0.890(0.661-1.197)   |         |                       |         | 1.003(0.742-1.356)   |         |                       |         |
| Menarche age (year) |                      | 0.611   |                       |         |                      | 0.269   |                       |         |

|              |                    |       |                    |       |                    |          |                    |
|--------------|--------------------|-------|--------------------|-------|--------------------|----------|--------------------|
| < 14         | 1(reference)       |       |                    |       | 1(reference)       |          |                    |
| ≥ 14         | 1.067(0.829-1.374) |       |                    |       | 1.159(0.891-1.508) |          |                    |
| Menopause    |                    | 0.008 |                    | 0.002 |                    | < 0.0001 | 0.006              |
| No           | 1(reference)       |       | 1(reference)       |       | 1(reference)       |          | 1(reference)       |
| Yes          | 1.637(1.137-2.357) |       | 1.439(1.147-1.806) |       | 1.552(1.217-1.979) |          | 1.380(1.098-1.733) |
| ALT (U/L)    |                    | 0.470 |                    |       |                    | 0.070    |                    |
| < 15         | 1(reference)       |       |                    |       | 1(reference)       |          |                    |
| ≥ 15         | 0.892(0.656-1.214) |       |                    |       | 0.746(0.543-1.024) |          |                    |
| AST (U/L)    |                    | 0.604 |                    |       |                    | 0.925    |                    |
| < 18         | 1(reference)       |       |                    |       | 1(reference)       |          |                    |
| ≥ 18         | 0.920(0.672-1.259) |       |                    |       | 1.015(0.737-1.397) |          |                    |
| LDH (U/L)    |                    | 0.483 |                    |       |                    | 0.901    |                    |
| < 167        | 1(reference)       |       |                    |       | 1(reference)       |          |                    |
| ≥ 167        | 1.106(0.834-1.466) |       |                    |       | 1.018(0.766-1.352) |          |                    |
| GGT (U/L)    |                    | 0.683 |                    |       |                    | 0.568    |                    |
| < 17         | 1(reference)       |       |                    |       | 1(reference)       |          |                    |
| ≥ 17         | 1.061(0.797-1.412) |       |                    |       | 1.089(0.811-1.463) |          |                    |
| ALP (U/L)    |                    | 0.081 |                    |       |                    | 0.111    |                    |
| < 64         | 1(reference)       |       |                    |       | 1(reference)       |          |                    |
| ≥ 64         | 1.288(0.969-1.712) |       |                    |       | 1.262(0.947-1.682) |          |                    |
| GLU (mmol/L) |                    | 0.003 |                    | 0.002 |                    | 0.013    | 0.023              |
| < 5.33       | 1(reference)       |       | 1(reference)       |       | 1(reference)       |          | 1(reference)       |
| ≥ 5.33       | 0.658(0.500-0.864) |       | 0.700(0.559-0.878) |       | 0.695(0.522-0.927) |          | 0.756(0.594-0.961) |
| IgA (g/L)    |                    | 0.853 |                    |       |                    | 0.372    |                    |
| < 2.30       | 1(reference)       |       |                    |       | 1(reference)       |          |                    |
| ≥ 2.30       | 1.024(0.794-1.321) |       |                    |       | 1.124(0.868-1.456) |          |                    |
| IgG (g/L)    |                    | 0.908 |                    |       |                    | 0.967    |                    |
| < 11.70      | 1(reference)       |       |                    |       | 1(reference)       |          |                    |
| ≥ 11.70      | 1.014(0.790-1.302) |       |                    |       | 1.005(0.782-1.291) |          |                    |

|              |                    |       |              |       |                    |       |                    |       |
|--------------|--------------------|-------|--------------|-------|--------------------|-------|--------------------|-------|
| IgM (g/L)    |                    | 0.401 |              |       |                    | 0.569 |                    |       |
| < 1.10       | 1(reference)       |       |              |       | 1(reference)       |       |                    |       |
| ≥1.10        | 0.898(0.700-1.152) |       |              |       | 0.928(0.719-1.198) |       |                    |       |
| ALB (g/L)    |                    | 0.050 |              |       |                    | 0.439 |                    |       |
| < 45.2       | 1(reference)       |       |              |       | 1(reference)       |       |                    |       |
| ≥45.2        | 1.260(1.000-1.587) |       |              |       | 1.105(0.856-1.426) |       |                    |       |
| CRP (mg/dl)  |                    | 0.330 |              |       |                    | 0.736 |                    |       |
| < 0.2        | 1(reference)       |       |              |       | 1(reference)       |       |                    |       |
| ≥0.2         | 0.868(0.653-1.153) |       |              |       | 0.949(0.704-1.280) |       |                    |       |
| CA125 (U/ml) |                    | 0.058 |              |       |                    | 0.201 |                    |       |
| < 13.35      | 1(reference)       |       |              |       | 1(reference)       |       |                    |       |
| ≥13.35       | 1.266(0.992-1.616) |       |              |       | 1.186(0.912-1.542) |       |                    |       |
| CA153 (U/ml) |                    | 0.104 |              |       |                    | 0.002 |                    | 0.001 |
| < 11.63      | 1(reference)       |       |              |       | 1(reference)       |       | 1(reference)       |       |
| ≥11.63       | 1.260(0.953-1.665) |       |              |       | 1.553(1.171-2.061) |       | 1.438(1.153-1.793) |       |
| CEA (ng/ml)  |                    | 0.507 |              |       |                    | 0.841 |                    |       |
| < 1.66       | 1(reference)       |       |              |       | 1(reference)       |       |                    |       |
| ≥1.66        | 0.915(0.706-1.187) |       |              |       | 1.027(0.788-1.338) |       |                    |       |
| D-D (mg/L)   |                    | 0.164 |              |       |                    | 0.240 |                    |       |
| < 0.29       | 1(reference)       |       |              |       | 1(reference)       |       |                    |       |
| ≥0.29        | 1.215(0.923-1.600) |       |              |       | 1.183(0.893-1.567) |       |                    |       |
| FIB (g/L)    |                    | 0.523 |              |       |                    | 0.256 |                    |       |
| < 2.85       | 1(reference)       |       |              |       | 1(reference)       |       |                    |       |
| ≥2.85        | 0.916(0.701-1.197) |       |              |       | 1.167(0.893-1.525) |       |                    |       |
| INR          |                    | 0.707 |              |       |                    | 0.048 |                    | 0.013 |
| < 0.93       | 1(reference)       |       |              |       | 1(reference)       |       | 1(reference)       |       |
| ≥0.93        | 0.953(0.741-1.224) |       |              |       | 1.292(1.002-1.666) |       | 1.322(1.061-1.649) |       |
| FDP (ug/ml)  |                    | 0.037 |              | 0.027 |                    | 0.334 |                    |       |
| < 1.40       | 1(reference)       |       | 1(reference) |       | 1(reference)       |       |                    |       |

|                                         |                    |       |                    |       |                    |       |                    |       |
|-----------------------------------------|--------------------|-------|--------------------|-------|--------------------|-------|--------------------|-------|
| ≥ 1.40                                  | 1.307(1.017-1.681) |       | 1.301(1.030-1.643) |       | 0.861(0.635-1.166) |       |                    |       |
| ABO blood type                          |                    | 0.087 |                    |       |                    | 0.079 |                    |       |
| A                                       | 1(reference)       |       |                    |       | 1(reference)       |       |                    |       |
| B                                       | 0.919(0.674-1.253) |       |                    |       | 0.854(0.618-1.180) |       |                    |       |
| O                                       | 0.733(0.529-1.015) |       |                    |       | 0.768(0.548-1.076) |       |                    |       |
| AB                                      | 1.248(0.795-1.958) |       |                    |       | 1.355(0.848-2.165) |       |                    |       |
| White blood cell (W)×10 <sup>9</sup> /L |                    | 0.067 |                    |       |                    | 0.127 |                    |       |
| < 6.01                                  | 1(reference)       |       |                    |       | 1(reference)       |       |                    |       |
| ≥ 6.01                                  | 1.457(0.974-2.181) |       |                    |       | 1.386(0.911-2.108) |       |                    |       |
| Red blood cell (R)×10 <sup>12</sup> /L  |                    | 0.859 |                    |       |                    | 0.399 |                    |       |
| < 4.40                                  | 1(reference)       |       |                    |       | 1(reference)       |       |                    |       |
| ≥ 4.40                                  | 0.972(0.716-1.320) |       |                    |       | 1.143(0.837-1.560) |       |                    |       |
| Hemoglobin (Hb)×10 <sup>9</sup> /L      |                    | 0.778 |                    |       |                    | 0.355 |                    |       |
| < 132                                   | 1(reference)       |       |                    |       | 1(reference)       |       |                    |       |
| ≥ 132                                   | 0.957(0.707-1.295) |       |                    |       | 0.868(0.644-1.170) |       |                    |       |
| Neutrophil (N)×10 <sup>9</sup> /L       |                    | 0.119 |                    |       |                    | 0.162 |                    |       |
| < 3.68                                  | 1(reference)       |       |                    |       | 1(reference)       |       |                    |       |
| ≥ 3.68                                  | 0.732(0.495-1.083) |       |                    |       | 0.751(0.504-1.121) |       |                    |       |
| Lymphocyte (L)×10 <sup>9</sup> /L       |                    | 0.913 |                    |       |                    | 0.033 |                    | 0.029 |
| < 1.76                                  | 1(reference)       |       |                    |       | 1(reference)       |       | 1(reference)       |       |
| ≥ 1.76                                  | 1.017(0.749-1.379) |       |                    |       | 1.325(1.023-1.716) |       | 1.309(1.028-1.666) |       |
| Monocyte (M)×10 <sup>9</sup> /L         |                    | 0.340 |                    |       |                    | 0.005 |                    | 0.002 |
| < 0.35                                  | 1(reference)       |       |                    |       | 1(reference)       |       | 1(reference)       |       |
| ≥ 0.35                                  | 0.877(0.671-1.147) |       |                    |       | 0.672(0.510-0.885) |       | 0.705(0.564-0.882) |       |
| Eosinophils (E)×10 <sup>9</sup> /L      |                    | 0.036 |                    | 0.029 |                    | 0.093 |                    |       |
| < 0.06                                  | 1(reference)       |       | 1(reference)       |       | 1(reference)       |       |                    |       |
| ≥ 0.06                                  | 0.752(0.577-0.981) |       | 0.780(0.624-0.974) |       | 0.812(0.637-1.035) |       |                    |       |
| Basophils (B)×10 <sup>9</sup> /L        |                    | 0.828 |                    |       |                    | 0.517 |                    |       |

|                                          |                    |          |                    |          |                    |          |                    |          |
|------------------------------------------|--------------------|----------|--------------------|----------|--------------------|----------|--------------------|----------|
| < 0.02                                   | 1(reference)       |          |                    |          | 1(reference)       |          |                    |          |
| ≥0.02                                    | 1.033(0.769-1.387) |          |                    |          | 1.103(0.819-1.485) |          |                    |          |
| Platelet (P)×10 <sup>9</sup> /L          |                    | 0.003    |                    | 0.006    |                    | 0.061    |                    |          |
| < 243                                    | 1(reference)       |          | 1(reference)       |          | 1(reference)       |          |                    |          |
| ≥243                                     | 0.666(0.510-0.869) |          | 0.704(0.550-0.902) |          | 0.776(0.595-1.011) |          |                    |          |
| Systemic immune-inflammation index (SII) |                    | < 0.0001 |                    | < 0.0001 |                    | < 0.0001 |                    | < 0.0001 |
| < 560                                    | 1(reference)       |          | 1(reference)       |          | 1(reference)       |          | 1(reference)       |          |
| ≥560                                     | 1.965(1.430-2.701) |          | 1.676(1.334-2.105) |          | 2.086(1.518-2.868) |          | 2.073(1.640-2.622) |          |
| Tumor site                               |                    | 0.205    |                    |          |                    | 0.279    |                    |          |
| Right                                    | 1(reference)       |          |                    |          | 1(reference)       |          |                    |          |
| Left                                     | 1.174(0.915-1.506) |          |                    |          | 1.149(0.893-1.477) |          |                    |          |
| US-Primary tumor site                    |                    | 0.429    |                    |          |                    | 0.548    |                    |          |
| Upper outer quadrant                     | 1(reference)       |          |                    |          | 1(reference)       |          |                    |          |
| Lower outer quadrant                     | 1.318(0.889-1.956) |          |                    |          | 1.294(0.859-1.950) |          |                    |          |
| Lower inner quadrant                     | 1.115(0.644-1.930) |          |                    |          | 1.476(0.853-2.553) |          |                    |          |
| Upper inner quadrant                     | 1.274(0.910-1.785) |          |                    |          | 1.111(0.782-1.578) |          |                    |          |
| Central                                  | 1.349(0.768-2.371) |          |                    |          | 1.093(0.619-1.929) |          |                    |          |
| US-Tumor size (cm)                       |                    | 0.389    |                    |          |                    | 0.639    |                    |          |
| ≤2cm                                     | 1(reference)       |          |                    |          | 1(reference)       |          |                    |          |
| > 2 and < 5cm                            | 0.823(0.602-1.126) |          |                    |          | 0.921(0.670-1.266) |          |                    |          |
| ≥5cm                                     | 1.002(0.543-1.848) |          |                    |          | 0.739(0.394-1.384) |          |                    |          |
| US-LNM                                   |                    | 0.861    |                    |          |                    | 0.477    |                    |          |
| No                                       | 1(reference)       |          |                    |          | 1(reference)       |          |                    |          |
| Yes                                      | 0.969(0.681-1.377) |          |                    |          | 1.138(0.796-1.625) |          |                    |          |
| US-BIRADS                                |                    | 0.676    |                    |          |                    | 0.509    |                    |          |
| 4 (4a 4b 4c)                             | 1(reference)       |          |                    |          | 1(reference)       |          |                    |          |
| 5                                        | 0.812(0.505-1.304) |          |                    |          | 0.766(0.457-1.284) |          |                    |          |
| 6                                        | 0.857(0.528-1.390) |          |                    |          | 0.849(0.500-1.441) |          |                    |          |
| Clinical stage                           |                    |          |                    |          |                    |          |                    |          |

|                                 |                    |       |                    |       |                    |       |                    |       |
|---------------------------------|--------------------|-------|--------------------|-------|--------------------|-------|--------------------|-------|
| Clinical T stage                |                    | 0.031 |                    | 0.022 |                    | 0.023 |                    | 0.011 |
| T1                              | 1(reference)       |       | 1(reference)       |       | 1(reference)       |       | 1(reference)       |       |
| T2                              | 2.323(1.332-4.051) |       | 1.930(1.183-3.150) |       | 2.413(1.345-4.328) |       | 2.305(1.392-3.817) |       |
| T3                              | 2.228(1.112-4.463) |       | 2.004(1.103-3.641) |       | 2.698(1.320-5.510) |       | 2.426(1.315-4.476) |       |
| T4                              | 2.121(1.055-4.745) |       | 1.851(1.072-3.671) |       | 2.861(1.236-6.619) |       | 2.333(1.158-4.703) |       |
| Clinical N stage                |                    | 0.188 |                    |       |                    | 0.320 |                    |       |
| N0                              | 1(reference)       |       |                    |       | 1(reference)       |       |                    |       |
| N1                              | 0.960(0.640-1.439) |       |                    |       | 1.029(0.666-1.590) |       |                    |       |
| N2                              | 1.004(0.501-2.015) |       |                    |       | 0.992(0.486-2.028) |       |                    |       |
| N3                              | 1.684(0.786-3.608) |       |                    |       | 1.626(0.723-3.656) |       |                    |       |
| Clinical TNM stage              |                    | 0.185 |                    |       |                    | 0.417 |                    |       |
| I                               | 1(reference)       |       |                    |       | 1(reference)       |       |                    |       |
| II                              | 0.563(0.300-1.055) |       |                    |       | 0.641(0.329-1.247) |       |                    |       |
| III                             | 0.630(0.259-1.530) |       |                    |       | 0.666(0.258-1.718) |       |                    |       |
| Operative time (min)            |                    | 0.292 |                    |       |                    | 0.121 |                    |       |
| < 90                            | 1(reference)       |       |                    |       | 1(reference)       |       |                    |       |
| ≥ 90                            | 0.859(0.649-1.138) |       |                    |       | 0.816(0.631-1.055) |       |                    |       |
| Type of surgery                 |                    | 0.221 |                    |       |                    | 0.316 |                    |       |
| Mastectomy                      | 1(reference)       |       |                    |       | 1(reference)       |       |                    |       |
| Breast-conserving surgery       | 0.799(0.558-1.144) |       |                    |       | 1.208(0.834-1.748) |       |                    |       |
| Histologic type                 |                    | 0.020 |                    | 0.027 |                    | 0.001 |                    | 0.011 |
| Ductal                          | 1(reference)       |       | 1(reference)       |       | 1(reference)       |       | 1(reference)       |       |
| Lobular                         | 2.518(1.102-5.750) |       | 2.473(1.131-5.410) |       | 3.314(1.394-7.877) |       | 2.140(1.035-4.423) |       |
| Others                          | 2.118(1.044-4.680) |       | 1.798(1.159-3.749) |       | 3.136(1.417-6.940) |       | 2.312(1.125-4.752) |       |
| Histologic grade                |                    | 0.120 |                    |       |                    | 0.203 |                    |       |
| I                               | 1(reference)       |       |                    |       | 1(reference)       |       |                    |       |
| II                              | 0.820(0.514-1.308) |       |                    |       | 0.810(0.506-1.296) |       |                    |       |
| III                             | 0.643(0.392-1.056) |       |                    |       | 0.658(0.394-1.098) |       |                    |       |
| Pathological TNM classification |                    |       |                    |       |                    |       |                    |       |



|                          |                    |       |                    |        |                    |          |                    |          |
|--------------------------|--------------------|-------|--------------------|--------|--------------------|----------|--------------------|----------|
| Molecular subtype        |                    | 0.039 |                    | 0.009  |                    | 0.114    |                    |          |
| Luminal A                | 1(reference)       |       | 1(reference)       |        | 1(reference)       |          |                    |          |
| Luminal B HER2+          | 0.248(0.092-0.670) |       | 0.372(0.199-0.697) |        | 0.290(0.105-0.800) |          |                    |          |
| Luminal B HER2-          | 0.608(0.354-0.958) |       | 0.504(0.305-0.830) |        | 0.533(0.308-0.921) |          |                    |          |
| HER2 enriched            | 0.186(0.064-0.546) |       | 0.325(0.174-0.609) |        | 0.358(0.120-1.069) |          |                    |          |
| Triple negative          | 0.591(0.294-0.843) |       | 0.527(0.300-0.924) |        | 0.658(0.328-1.321) |          |                    |          |
| ER status                |                    | 0.087 |                    |        |                    | 0.940    |                    |          |
| Negative                 | 1(reference)       |       |                    |        | 1(reference)       |          |                    |          |
| Positive                 | 0.642(0.386-1.066) |       |                    |        | 0.980(0.593-1.620) |          |                    |          |
| PR status                |                    | 0.256 |                    |        |                    | 0.217    |                    |          |
| Negative                 | 1(reference)       |       |                    |        | 1(reference)       |          |                    |          |
| Positive                 | 1.256(0.847-1.862) |       |                    |        | 1.265(0.870-1.838) |          |                    |          |
| HER2 status              |                    | 0.111 |                    |        |                    | 0.204    |                    |          |
| Negative (0--++)         | 1(reference)       |       |                    |        | 1(reference)       |          |                    |          |
| Positive (+++)           | 2.061(0.846-5.025) |       |                    |        | 1.769(0.732-4.271) |          |                    |          |
| Ki-67 status             |                    | 0.003 |                    | 0.001  |                    | 0.006    |                    | 0.001    |
| Negative ( $\leq 14\%$ ) | 1(reference)       |       | 1(reference)       |        | 1(reference)       |          | 1(reference)       |          |
| Positive ( $> 14\%$ )    | 1.694(1.197-2.396) |       | 1.666(1.222-2.272) |        | 1.631(1.154-2.306) |          | 1.691(1.251-2.286) |          |
| AR status                |                    | 0.474 |                    |        |                    | 0.820    |                    |          |
| Negative                 | 1(reference)       |       |                    |        | 1(reference)       |          |                    |          |
| Positive                 | 0.848(0.541-1.330) |       |                    |        | 0.943(0.574-1.551) |          |                    |          |
| CK5/6 status             |                    | 0.024 |                    | 0.0001 |                    | 0.049    |                    | 0.0002   |
| Negative                 | 1(reference)       |       | 1(reference)       |        | 1(reference)       |          | 1(reference)       |          |
| Positive                 | 1.674(1.071-2.614) |       | 1.900(1.371-2.632) |        | 1.600(1.001-2.557) |          | 1.847(1.335-2.556) |          |
| E-cad status             |                    | 0.173 |                    |        |                    | < 0.0001 |                    | < 0.0001 |
| Negative                 | 1(reference)       |       |                    |        | 1(reference)       |          | 1(reference)       |          |
| Positive                 | 1.271(0.899-1.797) |       |                    |        | 2.775(1.895-4.066) |          | 2.821(2.124-3.747) |          |
| EGFR status              |                    | 0.313 |                    |        |                    | 0.932    |                    |          |
| Negative                 | 1(reference)       |       |                    |        | 1(reference)       |          |                    |          |



|                                 |                    |          |                    |          |                    |        |                    |          |
|---------------------------------|--------------------|----------|--------------------|----------|--------------------|--------|--------------------|----------|
| Positive                        | 0.811(0.540-1.217) |          |                    |          | 0.981(0.636-1.512) |        |                    |          |
| P53 status                      |                    | 0.071    |                    |          |                    | 0.092  |                    |          |
| Negative                        | 1(reference)       |          |                    |          | 1(reference)       |        |                    |          |
| Positive                        | 0.773(0.585-1.021) |          |                    |          | 0.815(0.643-1.034) |        |                    |          |
| TOP2A status                    |                    | 0.292    |                    |          |                    | 0.479  |                    |          |
| Negative                        | 1(reference)       |          |                    |          | 1(reference)       |        |                    |          |
| Positive                        | 1.212(0.847-1.734) |          |                    |          | 1.146(0.785-1.672) |        |                    |          |
| Lymph vessel invasion           |                    | 0.028    |                    | 0.022    |                    | 0.016  |                    | 0.002    |
| Negative                        | 1(reference)       |          | 1(reference)       |          | 1(reference)       |        | 1(reference)       |          |
| Positive                        | 1.433(1.040-1.977) |          | 1.358(1.044-1.765) |          | 1.492(1.077-2.068) |        | 1.481(1.152-1.904) |          |
| Neural invasion                 |                    | 0.577    |                    |          |                    | 0.755  |                    |          |
| Negative                        | 1(reference)       |          |                    |          | 1(reference)       |        |                    |          |
| Positive                        | 0.887(0.584-1.348) |          |                    |          | 1.066(0.710-1.601) |        |                    |          |
| Postoperative chemotherapy      |                    | < 0.0001 |                    | < 0.0001 |                    | 0.0001 |                    | 0.0001   |
| No                              | 1(reference)       |          | 1(reference)       |          | 1(reference)       |        | 1(reference)       |          |
| Yes                             | 2.108(1.436-3.094) |          | 1.807(1.297-2.518) |          | 1.931(1.311-2.843) |        | 1.692(1.235-2.318) |          |
| Postoperative radiotherapy      |                    | 0.281    |                    |          |                    | 0.164  |                    |          |
| No                              | 1(reference)       |          |                    |          | 1(reference)       |        |                    |          |
| Yes                             | 1.198(0.862-1.665) |          |                    |          | 1.273(0.906-1.789) |        |                    |          |
| Postoperative endocrine therapy |                    | 0.051    |                    |          |                    | 0.211  |                    |          |
| No                              | 1(reference)       |          |                    |          | 1(reference)       |        |                    |          |
| Yes                             | 1.366(0.999-1.867) |          |                    |          | 1.217(0.894-1.657) |        |                    |          |
| Postoperative targeted therapy  |                    | < 0.0001 |                    | < 0.0001 |                    | 0.013  |                    | < 0.0001 |
| No                              | 1(reference)       |          | 1(reference)       |          | 1(reference)       |        | 1(reference)       |          |
| Yes                             | 2.480(1.713-3.591) |          | 2.050(1.600-2.628) |          | 1.592(1.105-2.293) |        | 1.687(1.317-2.161) |          |
